# Supplementary material for: An In-Silico Investigation to Design a Multi-Epitopes Vaccine against Multi-Drug Resistant Hafnia alvei
Source: MDPI journal article supplement (doi:10.3390/vaccines10071127), 2022-07-15
Supplement: s1 [file s1]

## Supplementary Files

# An *in-silico* investigation to design a multi-epitopes vaccine against multi-drug resistant *Hafnia alvei*

Fahad M. Alshabrmi <sup>1</sup>, Faris Alrumaihi <sup>1</sup>, Sahar Falah Alrasheedi <sup>1,2</sup>, Wafa Abdullah I. Al-Megrin <sup>3,\*</sup>, Ahmad Almatroudi <sup>1</sup> and Khaled S. Allemailem <sup>1,\*</sup>

- <sup>1</sup> Department of Medical Laboratories, College of Applied Medical Sciences, Qassim University, Buraydah 51452, Saudi Arabia; fshbrmy@qu.edu.sa (F.M.A.); f\_alrumaihi@qu.edu.sa (F.A.); aamtrody@qu.edu.sa (A.A.); k.allemailem@qu.edu.sa (K.S.A.)  
<sup>2</sup> Department of Laboratory and Blood Bank, King Saud Hospital, Unaizah 56437, Saudi Arabia; Sahar-f-r@hotmail.com  
<sup>3</sup> Department of Biology, College of Science, Princess Nourah bint Abdulrahman University, P.O. Box 84428, Riyadh 11671, Saudi Arabia; Waalmegrin@pnu.edu.sa  
\* Correspondence: k.allemailem@qu.edu.sa (K.S.A.); Waalmegrin@pnu.edu.sa (W.A.A.)

**Table S1.** Top 20 vaccine solutions docked to MHC-I. ACE (Atomic contact energy)

| Solution No | Score | Area    | ACE    | Transformation                       |
|-------------|-------|---------|--------|--------------------------------------|
| 1           | 20084 | 3776.50 | 461.02 | -0.25 -0.01 -0.38 39.82 -3.09 -3.95  |
| 2           | 18446 | 2303.10 | 283.20 | -1.59 -0.79 -2.72 11.82 42.86 -9.45  |
| 3           | 18114 | 3113.50 | 292.26 | -0.42 0.37 1.24 31.20 55.64 -0.41    |
| 4           | 17632 | 2497.30 | 336.75 | 1.91 0.78 -2.47 38.51 12.98 67.82    |
| 5           | 17592 | 2442.60 | 393.66 | 2.86 -0.06 0.56 6.24 40.34 50.02     |
| 6           | 17500 | 3013.10 | 266.27 | -3.12 0.31 0.52 14.25 37.64 60.94    |
| 7           | 17284 | 2823.10 | 184.81 | -1.38 0.31 2.91 -0.75 -6.32 -23.96   |
| 8           | 17226 | 2218.90 | 307.79 | 1.10 0.72 -0.57 28.41 20.06 -26.61   |
| 9           | 17092 | 2281.00 | 481.60 | 1.21 -0.72 -2.67 20.94 -20.63 -34.95 |
| 10          | 16886 | 2367.30 | 476.56 | 1.22 -0.83 2.18 -28.10 4.06 14.16    |
| 11          | 16868 | 2206.30 | 347.88 | 0.38 -0.36 1.28 -20.43 -0.69 -53.54  |
| 12          | 16868 | 3684.00 | 479.35 | 1.05 -0.48 -2.91 9.58 -17.26 -35.23  |
| 13          | 16858 | 2595.90 | 452.45 | 1.76 -0.18 -1.69 49.60 -14.20 0.59   |
| 14          | 16768 | 2428.50 | 470.11 | -1.55 -0.22 -2.34 -16.70 1.71 37.68  |
| 15          | 16730 | 2555.20 | 426.08 | -2.37 0.74 1.10 -4.53 -37.59 23.66   |
| 16          | 16670 | 2746.30 | 458.59 | 1.46 -0.41 1.66 28.12 38.19 51.79    |
| 17          | 16634 | 2390.10 | 199.31 | 1.60 0.72 -2.22 39.36 8.35 62.66     |
| 18          | 16608 | 2214.70 | 481.92 | -2.61 0.85 1.53 14.18 34.26 36.52    |
| 19          | 16524 | 2440.70 | 17.97  | -1.00 -0.60 -2.28 -3.00 59.12 -3.65  |
| 20          | 16478 | 1941.90 | 487.86 | -2.99 -0.77 2.59                     |

**Table S2.** Top 20 vaccine solutions docked to MHC-II. ACE (Atomic contact energy)

| Solution No | Score | Area    | ACE    | Transformation                      |
|-------------|-------|---------|--------|-------------------------------------|
| 1           | 19808 | 2637.70 | 425.40 | 2.32 1.05 2.24 111.47 14.97 3.54    |
| 2           | 19138 | 3205.40 | 230.51 | 0.22 -0.38 0.36 97.66 51.25 -33.45  |
| 3           | 18730 | 2614.40 | 260.01 | 3.08 -0.07 -1.12 123.77 71.57 45.71 |
| 4           | 18420 | 2601.20 | 249.28 | -1.34 -0.10 1.00 92.01 73.22 -3.72  |
| 5           | 18294 | 3049.40 | 161.53 | 2.71 -0.40 1.93 76.45 69.85 29.76   |
| 6           | 18044 | 2808.70 | 173.91 | 2.83 -0.42 2.77 73.84 118.18 21.96  |

|    |       |         |        |                                      |
|----|-------|---------|--------|--------------------------------------|
| 7  | 17998 | 2924.70 | 230.12 | -2.81 0.43 2.79 118.18 100.28 7.08   |
| 8  | 17966 | 3320.70 | 359.77 | 0.80 -0.54 -0.88 119.50 99.67 -38.90 |
| 9  | 17798 | 2515.60 | 16.63  | -1.03 0.19 -0.96 116.27 61.48 -29.90 |
| 10 | 17766 | 3577.20 | 58.31  | -2.60 0.63 2.62 119.52 99.93 5.10    |
| 11 | 17048 | 2898.20 | 499.16 | -0.26 0.08 -1.74 87.54 62.22 -41.86  |
| 12 | 16972 | 3016.20 | 380.12 | -0.94 0.47 2.72 134.88 85.41 10.53   |
| 13 | 16964 | 2385.90 | 167.63 | -3.09 -0.36 2.68 104.83 52.92 48.92  |
| 14 | 16948 | 2965.00 | 230.71 | 1.04 -0.47 -0.07 104.88 122.37 11.67 |
| 15 | 16834 | 2437.00 | 356.15 | -2.03 -0.02 0.83 115.24 72.94 38.08  |
| 16 | 16778 | 3084.00 | -19.67 | 1.39 1.09 -1.68 91.94 74.33 -1.13    |
| 17 | 16742 | 2953.90 | 360.87 | 2.99 -0.26 -0.96 132.21 74.56 37.51  |
| 18 | 16736 | 2919.90 | 134.64 | -0.00 0.37 2.26 90.66 116.50 -31.01  |
| 19 | 16580 | 2291.30 | 212.31 | 2.63 0.22 2.42 106.77 23.73 25.82    |
| 20 | 16564 | 2295.80 | -85.27 | 2.74 0.69 2.12 131.97 68.01 15.17    |

**Table S3.** Top 20 vaccine solutions docked to TLR-4. ACE (atomic contact energy)

| Solution No | Score | Area    | ACE     | Transformation                       |
|-------------|-------|---------|---------|--------------------------------------|
| 1           | 20888 | 3342.10 | 418.98  | 1.91 -0.70 0.63 -58.09 33.36 -74.40  |
| 2           | 20298 | 3216.30 | 329.41  | -0.59 -0.86 -1.57 -17.46 11.67 -2.46 |
| 3           | 20164 | 3596.40 | 157.69  | 0.31 0.55 -1.81 0.57 -7.60 -78.17    |
| 4           | 19214 | 2606.70 | 369.22  | -0.79 -0.90 -1.85 -13.90 10.67 -0.89 |
| 5           | 19068 | 2983.30 | 226.64  | -1.28 0.90 -1.92 -44.47 -35.40 24.78 |
| 6           | 18594 | 2912.90 | 79.04   | 1.76 -0.15 -2.73 -22.26 6.03 4.09    |
| 7           | 18222 | 3340.20 | -137.70 | -0.51 -0.98 2.32 8.59 2.74 -2.70     |
| 8           | 17840 | 2611.60 | 414.29  | -0.82 -0.56 -2.36 -70.54 15.63 -8.75 |
| 9           | 17686 | 2860.00 | 5.63    | -1.21 0.15 1.34 15.60 -17.07 11.98   |
| 10          | 17668 | 2664.00 | 139.44  | 0.04 -0.50 -2.67 -3.27 43.53 -54.57  |
| 11          | 17666 | 2373.40 | 115.73  | 1.45 -0.47 -0.26 -29.16 56.27 -77.88 |
| 12          | 17648 | 2151.70 | 391.40  | 0.40 1.35 0.76 -47.84 44.69 -50.57   |
| 13          | 17608 | 2579.70 | 205.70  | 0.23 0.49 1.07 21.38 39.68 -71.07    |
| 14          | 17564 | 2779.90 | 273.23  | -1.01 -0.02 1.72 23.35 -11.34 -17.24 |
| 15          | 17518 | 3092.50 | -7.98   | -2.89 0.13 -2.68 9.06 4.36 4.47      |
| 16          | 17364 | 2840.10 | 479.91  | 1.08 0.64 3.06 -13.98 22.28 -57.60   |
| 17          | 17248 | 2788.00 | 407.95  | 2.95 0.55 0.93 -17.51 39.47 -35.51   |
| 18          | 17182 | 2654.60 | 352.77  | -1.48 -0.45 -1.51 -44.12 10.69 1.80  |
| 19          | 17122 | 2861.70 | 451.74  | -2.19 -0.07 0.17 32.69 -24.87 -6.27  |
| 20          | 17068 | 2456.10 | 181.44  | -1.42 -0.93 -1.90 -9.96 5.79 -2.19   |

**Table S4.** Each term given is expressed in terms of energy in kJ.mol<sup>-1</sup> for FireDock solutions of MHC-I-vaccine. VdW (van der Waals), ACE (Atomic contact energy), HB (hydrogen bonds)

| Rank | Solution Number | Global Energy | Attractive VdW | Repulsive VdW | ACE   | HB    |
|------|-----------------|---------------|----------------|---------------|-------|-------|
| 1    | 8               | -21.50        | -41.11         | 25.75         | 5.56  | -6.63 |
| 2    | 9               | -13.40        | -30.00         | 15.55         | 14.99 | -3.02 |
| 3    | 2               | -8.11         | -36.41         | 18.00         | 8.82  | -1.38 |
| 4    | 10              | 2.10          | -20.24         | 9.21          | 10.72 | -2.48 |
| 5    | 6               | 7.42          | -4.85          | 1.17          | 1.86  | 0.00  |
| 6    | 4               | 8.32          | -29.45         | 53.90         | 6.04  | -4.09 |
| 7    | 3               | 16.74         | -6.96          | 9.67          | 2.44  | 0.00  |
| 8    | 5               | 24.55         | -23.68         | 14.84         | 12.49 | -0.92 |

|    |   |         |        |         |       |       |
|----|---|---------|--------|---------|-------|-------|
| 9  | 7 | 230.32  | -23.02 | 320.66  | -0.92 | -2.70 |
| 10 | 1 | 3200.07 | -37.79 | 4005.54 | 16.86 | -4.39 |

**Table S5.** Each term given is expressed in terms of energy in kJ.mol<sup>-1</sup> for FireDock solutions of MHC-II-vaccine. VdW (van der Waals), ACE (Atomic contact energy), HB (hydrogen bonds)

| Rank | Solution Number | Global Energy | Attractive VdW | Repulsive VdW | ACE   | HB    |
|------|-----------------|---------------|----------------|---------------|-------|-------|
| 1    | 2               | -19.72        | -13.46         | 5.29          | -5.89 | -1.24 |
| 2    | 5               | 7.13          | -0.13          | 0.00          | 0.36  | 0.00  |
| 3    | 3               | 8.32          | -3.50          | 0.00          | 4.02  | 0.00  |
| 4    | 4               | 30.90         | -7.58          | 18.23         | 8.47  | -0.55 |
| 5    | 8               | 59.59         | -5.74          | 64.58         | 4.50  | -0.72 |
| 6    | 1               | 85.77         | -25.12         | 106.46        | 1.23  | -1.19 |
| 7    | 6               | 192.17        | -17.52         | 256.10        | 6.96  | -3.22 |
| 8    | 7               | 245.06        | -10.66         | 282.87        | 4.99  | -0.22 |
| 9    | 9               | 639.37        | -45.52         | 865.45        | 4.31  | -1.39 |
| 10   | 10              | 1065.77       | -53.07         | 1420.49       | 9.90  | -7.76 |

**Table S6.** Each term given is expressed in terms of energy in kJ.mol<sup>-1</sup> for FireDock solutions of TLR4-vaccine. VdW (van der Waals), ACE (Atomic contact energy), HB (hydrogen bonds)

| Rank | Solution Number | Global Energy | Attractive VdW | Repulsive VdW | ACE   | HB    |
|------|-----------------|---------------|----------------|---------------|-------|-------|
| 1    | 2               | -27.78        | -43.87         | 58.42         | 13.27 | -6.89 |
| 2    | 3               | -10.35        | -10.11         | 2.50          | 1.76  | -0.96 |
| 3    | 4               | -3.28         | -56.17         | 98.25         | 16.51 | -8.00 |
| 4    | 10              | 6.15          | -13.73         | 4.41          | 4.57  | -4.59 |
| 5    | 7               | 6.78          | -7.23          | 5.87          | -0.41 | -0.86 |
| 6    | 8               | 9.40          | -34.10         | 18.67         | 19.01 | -6.26 |
| 7    | 9               | 15.77         | -4.56          | 0.66          | 4.46  | 0.00  |
| 8    | 1               | 18.88         | -12.01         | 16.40         | 10.21 | -1.53 |
| 9    | 5               | 35.80         | -23.87         | 13.38         | 17.59 | -3.81 |
| 10   | 6               | 483.78        | -43.86         | 697.80        | -0.47 | -2.85 |
